# Supplementary material for: Impact of Prolonged Temporal Discrimination Threshold on Finger Movements of Parkinson’s Disease
Source: PLoS One. 2016 Nov 28;11(11):e0167034. doi: 10.1371/journal.pone.0167034 (PMC5125668; doi:10.1371/journal.pone.0167034)
Supplement: S5 File — (XLSX) [file pone.0167034.s005.xlsx]

## Sheet: DATA
group	subject_serial	side_trial	gender	age_test	dis_dur_mo	UPDRS	amp_mean	sp_mean	fr_mean	amp_slope	sp_slope	fr_slope	amp_cv	sp_cv	fr_cv	CR_1st	CR_2nd	CR_3rd	CR_drop_1st	CR_drop_2nd	CR_drop_3rd	CR_score	TDT	UP_F_BR	UP_BR
PD	1	left	male	60	19	19	70.9619	549.27	3.97677	-0.351082	-3.22786	-0.00556236	0.190164	0.155198	0.0841632	11	10	9	0	0	0	10	180	2	3
PD	1	right	male	60	19	19	78.5774	457.678	3.02834	-0.574582	-7.98915	-0.0353232	0.213975	0.295802	0.183576	12	13	13	0	0	0	13	120	5	8
PD	2	left	female	74	13	28	96.3712	468.177	2.56883	-1.48076	-6.45202	0.00187343	0.298558	0.26671	0.272538	8	10	9	0	0	0	9	180	5	9
PD	2	right	female	74	13	28	75.7982	213.431	1.44704	0.610747	2.94506	0.0102952	0.135333	0.188292	0.11394	9	8	9	0	0	0	9	120	5	9
PD	3	left	male	66	25	22	47.3721	209.143	2.23511	-0.232327	-0.636282	0.00509341	0.12951	0.169219	0.130936	15	13	12	0	0	0	13	80	2	4
PD	3	right	male	66	25	22	13.6324	129.78	4.89993	0.0561652	0.851788	0.0093397	0.392065	0.349413	0.185005	14	13	11	0	0	0	13	120	4	7
PD	4	left	male	56	30	15	72.4594	500.723	3.54534	0.168594	-1.14906	-0.0148231	0.194254	0.17512	0.167099	10	8	10	0	0	0	10	110	1	1
PD	4	right	male	56	30	15	52.7653	325.109	3.07991	-0.31576	-1.29372	0.00568973	0.13336	0.173143	0.126433	11	9	10	0	0	0	10	65	2	3
PD	5	left	male	55	37	17	119.36	754.483	3.15742	-0.847957	-8.00568	-0.0110894	0.155844	0.188234	0.085445	8	10	9	0	0	0	9	55	2	4
PD	5	right	male	55	37	17	38.3674	284.226	3.71413	-0.0743208	-0.841277	-0.00375215	0.135269	0.123266	0.0579067	15	13	14	0	0	0	14	55	0	1
PD	6	left	male	56	17	14	102.924	739.737	3.62248	-0.483242	-1.5754	0.00994119	0.154672	0.125961	0.116483	16	15	17	0	0	0	16	100	2	2
PD	6	right	male	56	17	14	103.027	560.301	2.73491	-0.686078	-1.99659	0.00710602	0.113398	0.076667	0.0756534	13	16	16	0	0	0	16	70	2	5
PD	7	left	male	59	49	28	68.9651	495.366	3.64454	-0.640886	-3.63711	0.0066025	0.256418	0.230027	0.11672	10	9	8	0	0	0	9	130	2	5
PD	7	right	male	59	49	28	74.133	478.426	3.28807	-0.749812	-3.60758	0.00836463	0.175573	0.143046	0.0837358	11	10	10	0	0	0	10	55	3	6
PD	8	left	male	72	11	15	72.8275	483.844	3.33482	0.0073738	-1.41978	-0.00974218	0.12543	0.109976	0.075437	11	10	12	0	0	0	11	140	2	3
PD	8	right	male	72	11	15	93.3195	589.574	3.17108	-0.135169	-1.66983	-0.00498241	0.115366	0.0940881	0.055743	11	9	9	0	0	0	9	80	3	5
PD	9	left	male	59	14	28	69.0288	452.537	3.28484	-0.194964	-2.05036	-0.00571986	0.174364	0.189103	0.114829	8	9	10	0	0	0	9	80	4	6
PD	9	right	male	59	14	28	50.281	328.378	3.44207	-0.209811	-1.75179	-0.0058773	0.293802	0.238881	0.154236	7	10	9	0	0	0	9	140	4	7
PD	10	left	male	62	11	22	71.9819	385.93	2.67287	-0.392822	-3.29526	-0.00865542	0.127706	0.163852	0.0709371	12	11	10	0	0	0	11	60	3	5
PD	10	right	male	62	11	22	98.4956	539.612	2.7484	-0.476175	-1.22105	0.00681422	0.0862908	0.0856728	0.067705	13	14	15	0	0	0	14	50	2	3
PD	11	left	female	65	74	18	85.9546	352.279	2.06636	0.485326	3.29725	0.0104691	0.168058	0.166691	0.139111	9	7	8	0	0	0	8	75	3	5
PD	11	right	female	65	74	18	60.1624	425.077	3.71733	-0.779298	-1.88309	0.0276866	0.264946	0.138681	0.167989	10	10	10	0	0	0	10	145	3	5
PD	12	left	male	79	50	20	55.1091	408.517	3.71671	-0.334027	-3.06643	-0.0060965	0.180367	0.174996	0.0873857	9	9	9	0	0	0	9	70	2	7
PD	12	right	male	79	50	20	70.2406	386.368	2.75269	-0.0751027	-1.22694	-0.00547223	0.0849121	0.100889	0.0722252	8	8	7	1	0	0	7.2	80	2	5
PD	13	left	female	61	27	31	83.8957	416.093	2.53235	-1.12251	-5.49545	0.00579314	0.186688	0.186482	0.180948	7	5	5	0	1	1	4.5	100	5	9
PD	13	right	female	61	27	31	91.2512	421.021	2.31344	-0.798792	-3.19192	0.00227974	0.110054	0.107251	0.0545275	8	9	9	0	0	0	9	130	5	9
PD	14	left	male	47	26	17	78.004	487.177	3.12306	-0.0475848	-1.90566	-0.0104491	0.0706428	0.0970178	0.0817739	11	12	11	0	0	0	11	80	1	1
PD	14	right	male	47	26	17	52.6057	354.034	3.40569	-0.096161	2.0659	0.0228737	0.0676926	0.120458	0.115265	10	11	11	0	0	0	11	90	3	4
PD	15	left	female	69	41	22	53.3631	247.85	2.31003	-0.307106	-2.09668	-0.00706304	0.187976	0.225764	0.0722546	4	3	7	1	1	0	3.6	140	3	6
PD	15	right	female	69	41	22	71.7467	319.252	2.21896	-0.463627	-3.53489	-0.0101478	0.147357	0.180238	0.0809356	9	7	9	0	1	0	9	180	3	5
PD	16	left	female	69	8	21	65.0524	357.696	2.74343	-0.325222	-2.27405	-0.00384746	0.155079	0.173459	0.0808581	7	8	10	1	1	0	7.2	80	4	7
PD	16	right	female	69	8	21	40.394	254.185	3.17055	-0.183661	-1.46265	-0.00416511	0.19806	0.19892	0.116353	12	11	13	0	0	0	12	140	4	7
PD	17	left	male	63	4	23	77.2671	329.922	2.13935	0.215434	-0.423838	-0.00876134	0.0671122	0.0840012	0.0822452	10	10	11	0	0	0	10	80	2	4
PD	17	right	male	63	4	23	44.9305	180.318	2.14821	-0.154072	-0.987456	-0.0309128	0.14232	0.148003	0.341018	9	10	9	0	0	0	9	50	4	7
PD	18	left	male	63	3	15	82.1069	356.049	2.16474	-0.270701	-0.745414	0.00230778	0.0790967	0.0926492	0.053426	13	12	13	0	0	0	13	80	1	1
PD	18	right	male	63	3	15	79.4304	364.789	2.29942	-0.245076	-1.48053	-0.00238077	0.0703091	0.0752481	0.0541248	13	13	14	0	0	0	13	130	2	3
PD	19	left	female	62	8	19	109.644	586.784	2.74772	-0.673176	-4.04788	0.0013303	0.22249	0.246122	0.182507	7	8	10	0	0	0	8	150	2	4
PD	19	right	female	62	8	19	24.5516	105.745	2.12045	-0.321699	-2.14131	-0.0134115	0.280718	0.360092	0.206584	4	4	4	0	1	1	3.6	90	5	7
PD	20	left	male	76	52	22	90.7653	263.44	1.72087	-1.70445	-5.50114	0.0539578	0.22534	0.248107	0.49016	9	5	8	0	1	0	8	120	3	5
PD	20	right	male	76	52	22	65.8151	221.138	2.18839	-1.21066	-4.69012	0.0259561	0.273288	0.329722	0.641998	6	5	10	1	1	0	5.4	150	4	7
PD	21	left	male	48	4	43	40.8087	118.278	1.67159	-0.712449	-1.37631	0.00984951	0.405526	0.40459	0.64129	5	5	5	0	0	0	5	120	6	11
PD	21	right	male	48	4	43	51.4832	162.067	1.88824	-0.140392	-2.46673	-0.0405266	0.355236	0.335768	0.59758	6	7	6	0	0	0	6	150	5	10
PD	22	left	female	76	16	36	47.6216	179.07	1.99683	-0.193758	-1.02101	0.0136292	0.250582	0.277136	0.297378	4	5	5	0	0	0	5	90	5	10
PD	22	right	female	76	16	36	74.7214	259.628	1.73755	0.348879	-0.0254064	-0.00855799	0.0859531	0.0958179	0.0643186	5	7	9	1	0	0	7	100	4	8
PD	23	left	male	74	16	19	56.8482	327.84	2.90648	0.0052618	0.361979	0.00215843	0.118628	0.123393	0.0638234	13	13	10	0	0	0	13	150	2	3
PD	23	right	male	74	16	19	50.2171	317.006	3.17276	-0.13921	-0.299023	0.00662939	0.148556	0.136424	0.088144	12	12	13	0	0	0	12	150	3	5
PD	24	left	female	72	7	25	38.9039	153.721	2.04535	-0.79239	-3.3704	-0.00664922	0.311128	0.338737	0.250654	7	7	8	0	0	0	7	150	5	8
PD	24	right	female	72	7	25	100.892	433.474	2.14922	-0.244364	-1.47379	-0.00202207	0.0904978	0.104122	0.0446058	9	10	11	0	0	0	10	120	3	5
PD	25	left	male	64	6	11	114.137	554.91	2.42994	-0.0283192	-0.955759	-0.00362951	0.0769382	0.0940879	0.0477304	15	16	15	0	0	0	15	60	0	0
PD	25	right	male	64	6	11	102.578	498.849	2.43629	-0.334764	-1.13329	0.00234767	0.0565016	0.0600489	0.0452939	13	13	14	0	0	0	13	80	3	5
PD	26	left	male	80	65	44	40.4577	160.537	2.45453	-0.481767	-0.26021	-0.00922996	0.366917	0.377407	0.675832	5	4	6	0	0	0	5	100	5	10
PD	26	right	male	80	65	44	47.1459	159.707	1.97541	-1.04927	-3.12354	0.0191152	0.396743	0.359273	0.514272	8	6	7	0	0	0	7	80	4	9
PD	27	left	female	46	8	13	80.756	484.55	3.0037	0.0775682	-0.461788	-0.00520661	0.115771	0.155803	0.124541	10	10	8	1	0	0	9	80	2	3
PD	27	right	female	46	8	13	81.3892	525.547	3.28621	-0.345252	-4.20006	-0.0123121	0.203814	0.218487	0.174284	11	9	12	0	0	0	11	140	2	3
PD	28	left	female	67	7	10	80.6047	427.077	2.69333	-0.100286	-2.51675	-0.0118644	0.140179	0.158569	0.116965	15	16	17	0	0	0	16	100	1	2
PD	28	right	female	67	7	10	43.2602	252.291	2.89746	-0.512138	-3.53243	-0.00726578	0.222537	0.234466	0.0934591	13	15	11	0	0	0	13	50	2	4
PD	29	left	male	68	17	13	72.6756	465.682	3.23923	-0.44525	-1.60362	0.00885714	0.126386	0.0896532	0.0873202	14	18	18	0	0	0	18	50	1	3
PD	29	right	male	68	17	13	70.7862	470.592	3.38752	-0.291159	-1.10074	0.00735668	0.141791	0.115128	0.0858176	16	20	21	0	0	0	20	100	1	1
PD	30	left	male	52	11	11	49.8046	356.072	3.57042	-0.166969	-2.43755	-0.0137801	0.153817	0.170389	0.101851	11	13	12	0	0	0	12	50	1	2
PD	30	right	male	52	11	11	43.0598	311.377	3.61987	-0.155338	-1.33715	-0.00310965	0.13602	0.128339	0.0670101	14	10	14	0	1	0	14	40	1	1
PD	31	left	female	71	138	14	76.909	374.342	2.43547	-0.439619	-3.09839	-0.0041748	0.204565	0.221868	0.115313	11	10	10	0	0	0	10	60	2	4
PD	31	right	female	71	138	14	54.212	291.01	2.69353	0.0118126	-0.290303	-0.00415468	0.139628	0.125635	0.0701367	7	11	9	1	0	0	9	100	2	4
PD	32	left	male	53	13	21	49.7386	165.207	2.30836	-0.4452	-0.694519	-0.0245774	0.379786	0.352241	0.862178	9	8	13	0	0	0	9	80	4	6
PD	32	right	male	53	13	21	59.671	428.884	3.66293	-0.215656	0.766508	0.0182004	0.122612	0.110483	0.131082	7	15	17	1	0	0	15	70	2	3
PD	33	left	male	75	12	27	60.9698	389.087	3.25457	-0.256836	-1.53244	0.000428947	0.174213	0.120729	0.152241	13	12	13	0	0	0	13	30	4	8
PD	33	right	male	75	12	27	65.8482	417.494	3.18655	-0.214606	-0.507803	0.00625707	0.11001	0.104424	0.103812	12	12	13	0	0	0	12	70	2	4
control	34	left	female	60			112.311	623.599	2.775	-0.356602	-3.70225	-0.00754819	0.0857675	0.106762	0.0556128	10	13	14	0	0	0	13	50
control	34	right	female	60			94.6712	448.768	2.41016	-1.38678	-2.78446	0.0191958	0.171616	0.100124	0.1237	12	12	12	0	0	0	12	50
control	35	left	male	61			100.522	599.879	2.98385	-0.14443	-1.16066	-0.00149259	0.0683322	0.0863355	0.0526525	16	17	18	0	0	0	17	50
control	35	right	male	61			109.38	556.967	2.54921	0.48513	1.8277	-0.00284184	0.0721227	0.0646657	0.0403536	16	20	22	0	0	0	20	70
control	36	left	male	61			107.021	585.46	2.73891	-0.118048	-1.10114	-0.00215641	0.108417	0.107393	0.0503238	16	17	18	0	0	0	17	50
control	36	right	male	61			104.126	538.366	2.58658	0.134967	0.569887	-0.000499083	0.0715883	0.0725346	0.0370917	16	20	22	0	0	0	20	70
control	37	left	male	61			104.179	566.733	2.7185	-0.341436	-2.02726	-0.000708553	0.0895721	0.100662	0.0373416	16	17	18	0	0	0	17	50
control	37	right	male	61			109.782	557.988	2.54102	-0.281484	-1.98995	-0.00260298	0.0603874	0.0693209	0.0310733	16	20	22	0	0	0	20	70
control	38	left	female	62			70.1645	379.036	2.70129	0.290678	2.0088	0.00322275	0.0769612	0.121477	0.0991562	14	14	15	0	0	0	14	40
control	38	right	female	62			94.5669	501.868	2.66107	0.541405	1.9969	-0.00448483	0.088273	0.0709003	0.0577212	14	15	16	1	0	0	15	50
control	39	left	male	63			95.5399	731.818	3.85697	0.382137	0.549356	-0.0140131	0.113702	0.0900238	0.0848334	14	13	15	0	0	0	14	40
control	39	right	male	63			64.4599	544.014	4.27864	0.593743	4.08637	-0.00743238	0.279409	0.233764	0.099726	11	13	12	1	0	0	12	50
control	40	left	male	68			54.7125	416.804	3.82664	-0.0568292	-1.34451	-0.00907492	0.132142	0.114372	0.0713242	13	13	7	0	0	0	13	60
control	40	right	male	68			55.5013	437.537	3.95737	-0.0540549	-0.552674	-0.00185368	0.0975801	0.0736957	0.0613249	12	13	14	0	0	0	13	40
control	41	left	male	67			51.7865	352.947	3.44156	-0.661977	-4.32742	0.00156361	0.250229	0.228637	0.0955482	17	16	17	0	0	0	17	40
control	41	right	male	67			62.5717	311.158	2.49032	-0.0677025	0.535459	0.00699424	0.0729647	0.0738566	0.0578029	18	17	18	0	0	0	18	40
control	42	left	male	67			52.5681	315.449	3.02316	-0.142329	-1.43351	-0.00571024	0.147172	0.118472	0.0870059	17	16	17	0	0	0	17	40
control	42	right	male	67			60.8842	311.28	2.56401	-0.698213	-3.42099	0.00107508	0.151343	0.144833	0.0606069	18	17	18	0	0	0	18	40
control	43	left	male	67			49.9547	250.593	2.54129	0.00411956	-0.571265	-0.00587175	0.201564	0.147271	0.0963005	17	16	17	0	0	0	17	40
control	43	right	male	67			50.4609	268.385	2.67642	-0.69832	-3.36693	0.00296768	0.216484	0.193872	0.0597277	18	17	18	0	0	0	18	40
control	44	left	male	58			107.685	671.082	3.11725	-0.0551445	-0.125555	0.000884302	0.063797	0.0761481	0.0512716	16	16	15	0	0	0	16	40
control	44	right	male	58			102.674	565.166	2.79289	-0.115711	-0.873904	0.00197607	0.168491	0.171849	0.135389	15	18	18	0	0	0	18	40
control	45	left	male	58			99.5941	600.996	3.02478	0.0577321	-0.557921	-0.00472836	0.0612209	0.0534934	0.0638821	16	16	15	0	0	0	16	40
control	45	right	male	58			100.524	621.586	3.09163	-0.150837	-1.59054	-0.00333452	0.0392575	0.0625457	0.0474711	15	18	18	0	0	0	18	40
control	46	left	female	57			83.016	517.691	3.11754	-0.122827	-1.79791	-0.00630873	0.0703577	0.0895339	0.0526856	11	14	14	0	0	0	14	100
control	46	right	female	57			83.8224	356.069	2.12087	-1.15739	-4.19452	0.00390527	0.163658	0.182369	0.0808858	9	11	10	0	0	0	10	70
control	47	left	female	57			79.0098	478.256	3.02254	-0.248444	-3.39792	-0.0123943	0.091333	0.124085	0.0674278	11	14	14	0	0	0	14	100
control	47	right	female	57			79.0226	427.134	2.70277	-0.0289787	-0.418752	-0.0017402	0.120268	0.127243	0.0372862	9	11	10	0	0	0	10	70
control	48	left	female	57			75.2959	464.547	3.07641	-0.243258	-3.49538	-0.0134294	0.0758549	0.12567	0.0686713	11	14	14	0	0	0	14	100
control	48	right	female	57			82.7244	519.261	3.14338	-0.150277	-0.436472	0.00279646	0.0591026	0.0985664	0.09255	9	11	10	0	0	0	10	70
control	49	left	female	70			69.6843	399.57	2.87163	-0.0467356	-0.45864	-0.00177046	0.138661	0.143699	0.0701511	8	10	10	0	0	0	10	50
control	49	right	female	70			74.7761	499.884	3.37185	-0.264176	-2.53713	-0.00656221	0.16433	0.131957	0.0965424	11	11	11	0	0	0	11	80
control	50	left	female	70			61.1204	353.933	2.87034	-0.168825	-0.459081	0.00804982	0.180113	0.200653	0.126866	8	10	10	0	0	0	10	50
control	50	right	female	70			84.0129	525.075	3.15288	-0.430001	-2.7711	0.00012284	0.160116	0.140252	0.0934905	11	11	11	0	0	0	11	80
control	51	left	female	70			62.583	370.173	2.96563	0.277689	1.10363	-0.00397767	0.169845	0.161974	0.0561378	8	10	10	0	0	0	10	50
control	51	right	female	70			84.876	511.14	3.01086	0.0722261	-0.344155	-0.0057574	0.128797	0.161197	0.110905	11	11	11	0	0	0	11	80
control	52	left	male	59			136.385	934.827	3.43525	0.162314	0.277542	-0.00315256	0.0741141	0.0663702	0.0615013	14	14	14	0	0	0	14	60
control	52	right	male	59			80.5504	584.89	3.63739	-0.170751	-1.76372	-0.00406174	0.0718158	0.0915023	0.0862603	13	15	15	0	0	0	15	50
control	53	left	female	59			114.99	746.682	3.25474	-0.317689	-1.84623	0.000745778	0.0776157	0.0618482	0.0523481	14	14	14	0	0	0	14	60
control	53	right	female	59			87.6972	568.713	3.24706	0.0991091	0.0693758	-0.00343664	0.0534464	0.0487553	0.0491059	13	15	15	0	0	0	15	50
control	54	left	female	59			116.865	732.192	3.13848	-0.0687989	-3.70961	-0.0145835	0.0855336	0.102208	0.0842198	14	14	14	0	0	0	14	60
control	54	right	female	59			98.9643	619.07	3.13439	0.461117	2.06275	-0.00433579	0.0959346	0.086264	0.0486134	13	15	15	0	0	0	15	50
control	55	left	female	58			74.196	435.807	2.96908	0.374189	-2.71874	-0.0346491	0.113344	0.137623	0.16711	11	12	13	0	0	0	12	60
control	55	right	female	58			57.5153	421.2	3.7487	0.527175	0.929938	-0.0267972	0.198915	0.113925	0.132889	15	12	13	0	0	0	13	30
control	56	left	male	57			101.417	614.027	3.03199	-0.430865	-3.01743	-0.00208954	0.0910979	0.0911319	0.0579399	6	9	10	0	0	0	9	30
control	56	right	male	57			91.2233	663.275	3.65222	-0.163839	-0.11442	0.00527403	0.0815155	0.0391069	0.065158	13	12	10	0	0	0	12	30
control	57	left	female	58			100.243	562.5	2.8091	0.0150763	-2.89742	-0.0150176	0.0638326	0.0887653	0.080311	6	9	10	0	0	0	9	30
control	57	right	female	58			82.9086	567.6	3.42583	-0.369882	-3.51688	-0.00612739	0.113149	0.119886	0.058159	13	12	10	0	0	0	12	30
